# Supplementary material
Source: PubMed Central journal article supplement (PMC3474338)

**Bromophycoic acids: Bioactive natural products from  
a Fijian red alga *Callophycus* sp.**

*Margaret E. Teasdale*<sup>†</sup>, *Tonya L. Shearer*<sup>†</sup>, *Sebastian Engel*<sup>†</sup>, *Troy S. Alexander*<sup>‡</sup>,  
*Craig R. Fairchild*<sup>§</sup>, *Karine Le Roch*<sup>⊥</sup>, *Jacques Prudhomme*<sup>⊥</sup>, *William Aalbersberg*<sup>||</sup>,  
*Mark E. Hay*<sup>†</sup>, *Julia Kubanek*<sup>\*†‡</sup>

**Supporting Information**

| <b>Table of Contents:</b>                                            | <b>Page:</b> |
|----------------------------------------------------------------------|--------------|
| 1) Table 1: Red algae used for phylogenetic analysis.....            | 2            |
| 2) Table 2: GenBank BLAST results .....                              | 3            |
| 3) Table 3: COSY correlations for bromophycoic acids A-E (1-5) ..... | 4            |
| 4) Table 4: HMBC correlations for bromophycoic acids A-E (1-5).....  | 5            |
| 5) Table 5: NOE data for bromophycoic acids A-E (1-5).....           | 6            |
| 6) Table 6: HSQC-TOCSY data for bromophycoic acid E (5).....         | 7            |
| 7) Figures 1-6: NMR spectra of bromophycoic acid A (1).....          | 8            |
| 8) Figures 7-12: NMR spectra of bromophycoic acid B (2).....         | 11           |
| 9) Figures 13-18: NMR spectra of bromophycoic acid C (3).....        | 14           |
| 10) Figures 19-24: NMR spectra of bromophycoic acid D (4).....       | 17           |
| 11) Figures 25-32: NMR spectra of bromophycoic acid E (5).....       | 20           |

Table 1. Red alga of the class Florideophyceae for phylogenetic analysis and corresponding GenBank accession numbers for the small subunit ribosomal RNA (18S rRNA) and cytochrome *c*.

| Subclass              | Order                             | Species                             | GenBank Accessions        |          |
|-----------------------|-----------------------------------|-------------------------------------|---------------------------|----------|
|                       |                                   |                                     | 18S rRNA                  | COI      |
| Rhodymeniophycidae    | Ceramiales                        | <i>Laurencia majuscula</i>          | GU223784                  | HQ422617 |
|                       |                                   | <i>Leveillea jungermannioides</i>   | GU223793                  | HQ423107 |
|                       |                                   | <i>Polysiphonia fucoides</i>        | AF427530                  | HM573496 |
|                       | Gelidiales                        | <i>Gelidium pusillum</i>            | U32564                    | HQ412446 |
|                       |                                   | <i>Pterocliadiella caerulescens</i> | EF191193                  | HQ412475 |
|                       |                                   | Gigartinales                        | <i>Callophycus densus</i> | FJ660609 |
|                       | <i>Callophycus serratus</i>       |                                     | FJ660613                  | JX135006 |
|                       | <i>Callophycus oppositifolius</i> |                                     | AY437654                  |          |
|                       | <i>Dumontia contorta</i>          |                                     |                           | AY971161 |
|                       | <i>Gibsmithia dotyi</i>           |                                     | AF317108                  | HQ422673 |
|                       | <i>Hennedyia crispa</i>           |                                     | AY437652                  |          |
|                       | <i>Hypnea flexicaulis</i>         |                                     | EU240850                  | FN823052 |
|                       | Gracilariales                     | <i>Portieria hornemanii</i>         | AF317118                  | HQ422692 |
|                       |                                   | <i>Gracilaria vermiculophylla</i>   | GQ292853                  | EF434926 |
|                       |                                   | Rhodymeniales                       | <i>Champia parvula</i>    | EF190546 |
|                       | <i>Coelothrix irregularis</i>     |                                     | EU086456                  | HQ422592 |
|                       | <i>Rhodymenia leptophylla</i>     |                                     | U09621                    | HM033088 |
| Corallinophycidae     | Corallinales                      | <i>Corallina elongata</i>           | EU095607                  | FM180065 |
|                       |                                   | <i>Haliptilon squamatum</i>         | EU095617                  | FM180090 |
|                       |                                   | <i>Jania rubens</i>                 | EU095621                  | FM180064 |
| Hildenbrandiophycidae | Hildenbrandiales                  | <i>Hildenbrandia rubra</i>          | AF076995                  | HQ422942 |

Table 2. Results of similarity searches of G-0807 small subunit ribosomal RNA (18S rRNA) and cytochrome *c* oxidase subunit 1 (COI) from BLAST search in the GenBank nucleotide database.

|          | Similar species                      | GenBank accession | E-value | Max identity |
|----------|--------------------------------------|-------------------|---------|--------------|
| 18S rRNA | <i>Callophycus oppositifolius</i>    | AY437654          | 0       | 99%          |
|          | <i>Hennedya crispa</i>               | AY437652          | 0       | 99%          |
|          | <i>Mychodeophyllum papillitectum</i> | AY437687          | 0       | 98%          |
|          | <i>Areschougia congesta</i>          | U09613            | 0       | 98%          |
|          | <i>Calviclonium ovatum</i>           | AY437650          | 0       | 98%          |
|          | <i>Acrotylus australis</i>           | AY437647          | 0       | 98%          |
|          | <i>Tichocarpus crinitus</i>          | AY437698          | 0       | 98%          |
|          | <i>Schmitziella endophloea</i>       | AY437697          | 0       | 98%          |
|          | <i>Erythroclonium angustatum</i>     | AY437655          | 0       | 98%          |
|          | <i>Mychodea marginifera</i>          | AY437685          | 0       | 98%          |
|          | <i>Rhabdonia verticillata</i>        | AY437656          | 0       | 98%          |
|          | <i>Mychodea pusilla</i>              | AY437686          | 0       | 98%          |
|          | <i>Mychodea acanthymenia</i>         | EF033589          | 0       | 98%          |
|          | <i>Austroclonium charoides</i>       | AY437666          | 0       | 98%          |
|          | <i>Furcellaria lumbricalis</i>       | Z14141            | 0       | 98%          |
|          | <i>Mychodea carnosa</i>              | U33135            | 0       | 98%          |
|          | <i>Nizymenia australis</i>           | U09616            | 0       | 98%          |
|          | <i>Dicranema revolutum</i>           | AY437678          | 0       | 98%          |
|          | <i>Phacelocarpus peperocarpus</i>    | U09617            | 0       | 97%          |
|          | <i>Caulacanthus okamurae</i>         | AY437663          | 0       | 97%          |
| COI      | <i>Dumontia contorta</i>             | AY971161          | 5e-164  | 88%          |
|          | <i>Predaea sp.</i>                   | HQ422703          | 5e-164  | 88%          |
|          | <i>Kallymeniaceae sp.</i>            | JQ255028          | 2e-162  | 88%          |
|          | <i>Euthora timburtonii</i>           | GU140181          | 2e-162  | 88%          |
|          | <i>Acrosymphyton taylorii</i>        | HQ422907          | 1e-160  | 88%          |
|          | <i>Pugetia cryptica</i>              | JF903305          | 2e-152  | 87%          |

Table 3. COSY correlations for bromophycoic acids A-E (1-5). For diastereotopic protons with dissimilar chemical shifts, the proton whose chemical shift is listed first in Table 1 of the main article is termed “a” and the other is “b”. “NA” (not applicable) indicates that no proton signal exists for that position.

| <sup>1</sup> H at Position # COSY correlations observed between protons listed on far left and those below: |             |                   |                   |               |                   |
|-------------------------------------------------------------------------------------------------------------|-------------|-------------------|-------------------|---------------|-------------------|
|                                                                                                             | 1           | 2                 | 3                 | 4             | 5                 |
| 3                                                                                                           | -           | 5a, 5b            | 5a, 5b            |               | 5a, 5b            |
| 5a                                                                                                          | 5b, 6       | 3, 5b, 6          | 3, 5b, 6          | 5b, 6         | 3, 5b, 6          |
| 5b                                                                                                          | 5a, 6       | 3, 5a, 6          | 3, 5a, 6          | 5a, 6         | 3, 5a, 6          |
| 6                                                                                                           | 5a, 5b      | 5a, 5b            | 5a, 5b            | 5a, 5b        | 5a, 5b, 21a, 21b  |
| 8a                                                                                                          | 8b          | 8b                | 8b, 22b           | 8b            | NA                |
| 8b                                                                                                          | 8a          | 8a, 22b           | 8a, 22b           | 8a            | NA                |
| 9a                                                                                                          | NA          | NA                | NA                | NA            | 9b, 10a, 10b      |
| 9b                                                                                                          | NA          | NA                | NA                | NA            | 9a, 10a, 10b      |
| 10a                                                                                                         | 11a, 11b    | 10b, 11a, 11b     | 10b, 11a, 11b,    | -             | 9a, 9b, 10a, 11   |
| 10b                                                                                                         | NA          | 10a, 11a, 11b     | 10a, 11a, 11b     | -             | 9a, 9b, 10a, 11   |
| 11a                                                                                                         | 10, 11b, 12 | 10a, 10b, 11b, 12 | 10a, 10b, 11b, 12 | 11b, 12       | 10a, 10b          |
| 11b                                                                                                         | 10, 11a, 12 | 10a, 10b, 11a, 12 | 10a, 10b, 11a, 12 | 11a, 12       | NA                |
| 12                                                                                                          | 11a, 11b    | 11a, 11b          | 11a, 11b          | 11a, 11b      | NA                |
| 13a                                                                                                         | NA          | NA                | NA                | NA            | 13b, 14a, 14b     |
| 13b                                                                                                         | NA          | NA                | NA                | NA            | 13a, 14a, 14b     |
| 14a                                                                                                         | 15a, 15b    | 15, 16            | 15, 16            | 15a, 15b      | 13a, 13b, 14b, 15 |
| 14b                                                                                                         | -           | -                 | -                 | -             | 13a, 13b, 14a, 15 |
| 15a                                                                                                         | 14, 15b, 16 | 14, 16            | 14, 16            | 14, 15b       | 14a, 14b, 17, 27  |
| 15b                                                                                                         | 14, 15a, 16 | NA                | NA                | 14, 15a       | NA                |
| 16                                                                                                          | 15a, 15b    | 14, 15a           | 14, 15            | -             | NA                |
| 17                                                                                                          | NA          | NA                | NA                | NA            | 15                |
| 18a                                                                                                         | -           | -                 | -                 | 27            | 19                |
| 18b                                                                                                         | NA          | NA                | NA                | 27            | NA                |
| 19                                                                                                          | 20          | 20                | 20                | 20            | 18                |
| 20                                                                                                          | 19          | 19                | 19                | 19            | NA                |
| 21a                                                                                                         | NA          | NA                | NA                | NA            | 6, 21b, 22        |
| 21b                                                                                                         | NA          | NA                | NA                | NA            | 6, 21a            |
| 22a                                                                                                         | 22b         | 22b               | 22b               | 22b, 23a, 23b | 21a               |
| 22b                                                                                                         | 22a, 23     | 8b, 22a, 23a, 23b | 8a, 8b, 22a, 23b  | 22a, 23a, 23b | -                 |
| 23a                                                                                                         | 22b         | 22b, 23b, 24      | 23b               | 22a, 22b      | -                 |
| 23b                                                                                                         | NA          | 22b, 23a          | 22b, 23a          | 22b           | NA                |
| 24                                                                                                          | -           | -                 | -                 | -             | -                 |
| 25                                                                                                          | -           | -                 | -                 | -             | -                 |
| 26                                                                                                          | -           | -                 | -                 | -             | -                 |
| 27                                                                                                          | -           | -                 | -                 | 18a, 18b      | 15                |

Table 4. HMBC correlations for bromophycoic acids A-E (1-5). For diastereotopic protons with dissimilar chemical shifts, the proton whose chemical shift is listed first in Table 1 of the main article is termed “a” and the other is “b”. “NA” (not applicable) indicates that no proton signal exists for that position.

| <sup>1</sup> H at Position # HMBC Correlations observed between protons listed on far left and carbons at positions listed below: |                       |                        |                        |                |                   |
|-----------------------------------------------------------------------------------------------------------------------------------|-----------------------|------------------------|------------------------|----------------|-------------------|
|                                                                                                                                   | 1                     | 2                      | 3                      | 4              | 5                 |
| 3                                                                                                                                 | 1, 5, 19, 21          | 1, 5, 19, 21           | 1, 5, 19, 21           | 1, 5, 19, 21   | 1, 5, 18, 20      |
| 5a                                                                                                                                | 3, 4, 7, 21           | 4, 7, 21               | 4, 7, 21               | 4, 7           | 4, 6, 20, 21      |
| 5b                                                                                                                                | 3, 4, 6, 7, 21        | 4, 6, 7, 21            | 4, 6, 7, 21            | 3, 4, 6, 7     | 3, 4, 6, 7, 20    |
| 6                                                                                                                                 | 5, 7, 21              | 5, 7                   | 5, 7                   | 7              | 5, 7, 24          |
| 8a                                                                                                                                | -                     | 6, 7, 9, 10            | 6, 7, 25               | 6, 7, 9, 25    | N/A               |
| 8b                                                                                                                                | 6, 7, 9, 22, 24, 25   | 6, 7, 9, 22, 24        | 7, 9, 22, 24, 25       | 7              | N/A               |
| 9a                                                                                                                                | NA                    | NA                     | NA                     | NA             | 8, 11             |
| 9b                                                                                                                                | NA                    | NA                     | NA                     | NA             | 8, 11, 25         |
| 10a                                                                                                                               | -                     | -                      | -                      | -              | 12                |
| 10b                                                                                                                               | -                     | 12                     | 12, 25                 | -              | 11, 12            |
| 11a                                                                                                                               | 9, 10, 12             | 9                      | 9                      | -              | 9, 10, 12, 13, 26 |
| 11b                                                                                                                               | 10, 12                | -                      | -                      | -              | N/A               |
| 12                                                                                                                                | 11, 13, 26            | 11, 13, 26             | 11, 26                 | 26             | N/A               |
| 13a                                                                                                                               | NA                    | NA                     | NA                     | NA             | 11, 12            |
| 13b                                                                                                                               | NA                    | NA                     | NA                     | NA             | 11, 12, 14        |
| 14                                                                                                                                | 9, 12, 13, 16, 23, 24 | 12, 13, 15, 16, 24, 26 | 12, 13, 15, 16, 24, 26 | -              | -                 |
| 14b                                                                                                                               | -                     | -                      | -                      | -              | 15                |
| 15a                                                                                                                               | 16, 17                | 14, 16, 17             | 14, 16, 17             | 16             | 17, 27            |
| 15b                                                                                                                               | 16, 17                | NA                     | NA                     | 16             | N/A               |
| 16                                                                                                                                | 14, 15, 18, 27        | 14, 15, 17, 18, 27     | 14, 15, 17, 18, 27     | NA             | N/A               |
| 17                                                                                                                                | NA                    | NA                     | NA                     | NA             | 15, 16, 27        |
| 18a                                                                                                                               | 14, 16, 17, 27        | 16, 17, 27             | 16, 17, 27             | 16, 27         | 1, 3, 20          |
| 18b                                                                                                                               | NA                    | -                      | -                      | 16, 17, 27     | NA                |
| 19                                                                                                                                | 1, 3, 21              | 1, 3, 21               | 1, 3, 21               | 1, 3, 21       | 1, 2, 4, 20       |
| 20                                                                                                                                | 2, 3, 4, 21           | 2, 4, 21               | 2, 4, 21               | 2, 4           | NA                |
| 21a                                                                                                                               | NA                    | NA                     | NA                     | NA             | -                 |
| 21b                                                                                                                               | NA                    | NA                     | NA                     | NA             | 6                 |
| 22a                                                                                                                               | -                     | -                      | 24                     | -              | -                 |
| 22b                                                                                                                               | 7, 8, 23, 24          | -                      | -                      | -              | -                 |
| 23a                                                                                                                               | -                     | -                      | -                      | -              | 12, 13            |
| 23b                                                                                                                               | -                     | -                      | -                      | 22, 24         | NA                |
| 24                                                                                                                                | -                     | -                      | 9, 10, 13, 26          | 13, 9, 22, 26  | 6, 7, 8           |
| 25                                                                                                                                | 8, 9, 10, 24          | 8, 9, 10, 24           | 6, 8, 9, 10, 24        | 8, 9, 10, 24   | 7, 8, 9, 23       |
| 26                                                                                                                                | 12, 13, 14, 24        | 12, 13, 14, 24         | 12, 13, 14, 15, 24     | 12, 13, 14, 24 | 1, 12, 13, 23     |
| 27                                                                                                                                | 14, 16, 17, 18        | 16, 17, 18             | 16, 17, 18             | 16, 17, 18     | 15, 16, 17        |

Table 5. Observed NOEs from NOESY and ROESY NMR experiments, for bromophycoic acids A-E (**1-5**). For diastereotopic protons with dissimilar chemical shifts, the proton whose chemical shift is listed first in Tables 1 of the main article is termed “a” and the other is “b”. Only NOEs important to determinations of stereochemistry are listed.

| <sup>1</sup> H at Position # | NOE observed between protons listed on far left and protons at positions listed below: |                     |                  |                      |                |
|------------------------------|----------------------------------------------------------------------------------------|---------------------|------------------|----------------------|----------------|
|                              | <b>1</b>                                                                               | <b>2</b>            | <b>3</b>         | <b>4</b>             | <b>5</b>       |
| 3                            | 5b                                                                                     | 5a, 5b, 6           |                  | 5a, 5b               | 5a, 5b         |
| 5a                           | 6, 8b, 25                                                                              | 3, 6, 8b, 25        | 6                | 3, 6, 25             | 3, 24          |
| 5b                           | 3, 6, 8b, 22b, 25                                                                      | 3, 8b               | 8b               | 3, 6, 8b             | 3, 6, 21b      |
| 6                            | 5a, 5b, 22b, 23, 25                                                                    | 3, 5a, 22b, 23a, 25 | 5a, 22b, 23a, 25 | 5a, 5b, 22b, 23a, 25 | 5b, 21b, 25    |
| 8a                           |                                                                                        |                     |                  |                      |                |
| 8b                           | 5a, 5b, 25                                                                             | 5a, 5b              | 5b               | 5b                   |                |
| 9a                           |                                                                                        |                     |                  |                      | 24             |
| 9b                           |                                                                                        |                     |                  |                      |                |
| 10a                          | 12, 24                                                                                 |                     | 12               |                      | 9b, 11         |
| 10b                          |                                                                                        | 11a, 11b            |                  |                      | 25, 26         |
| 11a                          | 12, 14                                                                                 | 10b, 12, 24         | 12               | 12                   | 10a, 23, 24    |
| 11b                          | 25, 26                                                                                 | 10b, 25, 26         | 25               | 25, 26               |                |
| 12                           | 10a, 11a, 14, 24                                                                       | 11a, 24             | 10a, 11a, 24     | 11a                  |                |
| 13a                          |                                                                                        |                     |                  |                      |                |
| 13b                          |                                                                                        |                     |                  |                      |                |
| 14a                          | 11a, 12                                                                                |                     |                  |                      |                |
| 14b                          |                                                                                        |                     |                  |                      |                |
| 15a                          |                                                                                        |                     |                  |                      |                |
| 15b                          |                                                                                        |                     |                  |                      |                |
| 16                           |                                                                                        |                     |                  |                      |                |
| 17                           |                                                                                        |                     |                  |                      |                |
| 18a                          |                                                                                        |                     |                  |                      |                |
| 18b                          |                                                                                        |                     |                  |                      |                |
| 19                           |                                                                                        |                     |                  |                      |                |
| 20                           |                                                                                        |                     |                  |                      |                |
| 21a                          |                                                                                        |                     |                  |                      |                |
| 21b                          |                                                                                        |                     |                  |                      | 5b, 6          |
| 22a                          |                                                                                        |                     |                  |                      |                |
| 22b                          | 5b, 6, 23                                                                              | 6                   | 6                | 6, 23a               |                |
| 23a                          | 6, 22b, 25, 26                                                                         | 6, 25, 26           | 6                | 6, 22b               | 11, 24         |
| 23b                          |                                                                                        |                     |                  |                      |                |
| 24                           | 10a, 12                                                                                | 11a, 12             | 12               |                      | 5a, 9a, 11, 23 |
| 25                           | 5a, 5b, 6, 8b, 11b, 23, 26                                                             | 5a, 6, 11b, 23a, 26 | 6, 11b, 26       | 5a, 6, 11b           | 6, 10b         |
| 26                           | 11b, 23, 25                                                                            | 11b, 23a, 25        | 25               | 11b                  | 10b            |
| 27                           |                                                                                        |                     |                  |                      |                |

Table 6. HSQC-TOCSY correlations for bromophycoic acid E (**5**). For diastereotopic protons with dissimilar chemical shifts, the proton whose chemical shift is listed first in Table 1 of the main article is termed “a” and the other is “b”.

| <sup>1</sup> H at Position # | HSQC-TOCSY observed between protons listed on far left and carbons at positions listed below: |
|------------------------------|-----------------------------------------------------------------------------------------------|
| 3                            | 3, 5, 7, 19                                                                                   |
| 5a                           | 5, 6                                                                                          |
| 5b                           | 5, 6                                                                                          |
| 6                            | 5, 6                                                                                          |
| 8a                           |                                                                                               |
| 8b                           |                                                                                               |
| 9a                           | 9, 10, 11                                                                                     |
| 9b                           | 9, 10, 11                                                                                     |
| 10a                          | 9, 10, 11                                                                                     |
| 10b                          | 9, 10, 11                                                                                     |
| 11a                          | 9, 10, 11                                                                                     |
| 11b                          |                                                                                               |
| 12                           |                                                                                               |
| 13a                          | 13, 14                                                                                        |
| 13b                          | 13, 14                                                                                        |
| 14                           | 13, 14, 15                                                                                    |
| 14b                          | 13, 14, 15                                                                                    |
| 15a                          | 13, 14, 15, 17                                                                                |
| 15b                          |                                                                                               |
| 16                           |                                                                                               |
| 17                           |                                                                                               |
| 18a                          | 18, 19                                                                                        |
| 18b                          |                                                                                               |
| 19                           | 18, 19                                                                                        |
| 20                           |                                                                                               |
| 21a                          | 6, 22, 23                                                                                     |
| 21b                          | 6, 22, 23                                                                                     |
| 22a                          | 21, 22, 23                                                                                    |
| 22b                          |                                                                                               |
| 23a                          | 21, 22, 23                                                                                    |
| 23b                          |                                                                                               |
| 24                           |                                                                                               |
| 25                           |                                                                                               |
| 26                           |                                                                                               |
| 27                           |                                                                                               |

Figure 1.  $^1\text{H}$  NMR spectrum of bromophycoic acid A (**1**) (500 MHz;  $\text{DMSO-d}_6$ ).

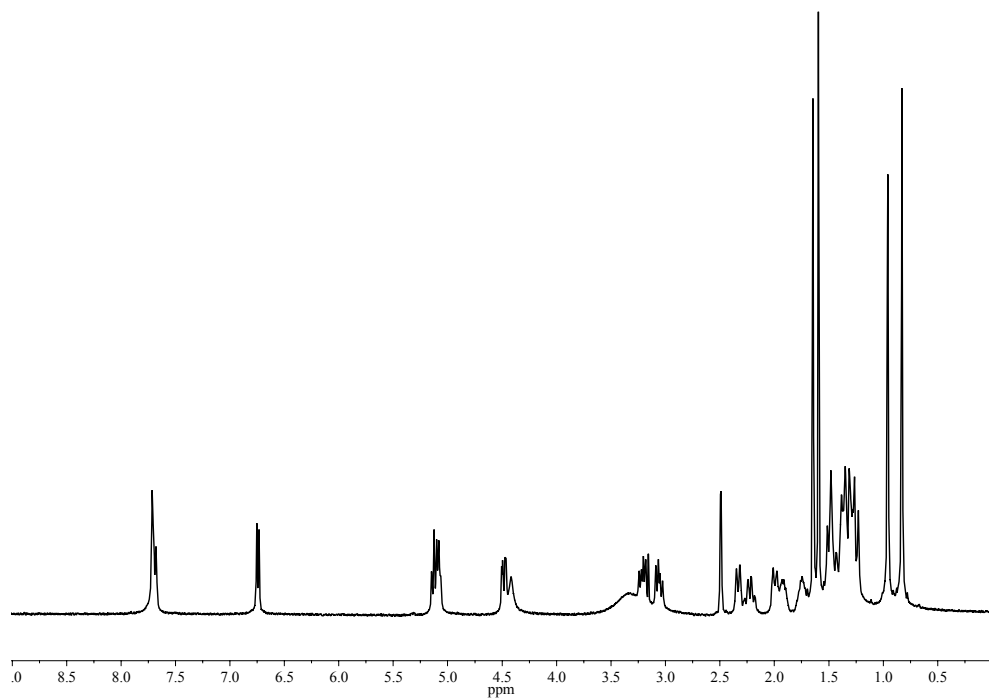

Figure 2.  $^{13}\text{C}$  NMR spectrum of bromophycoic acid A (**1**) (125 MHz;  $\text{DMSO-d}_6$ ).

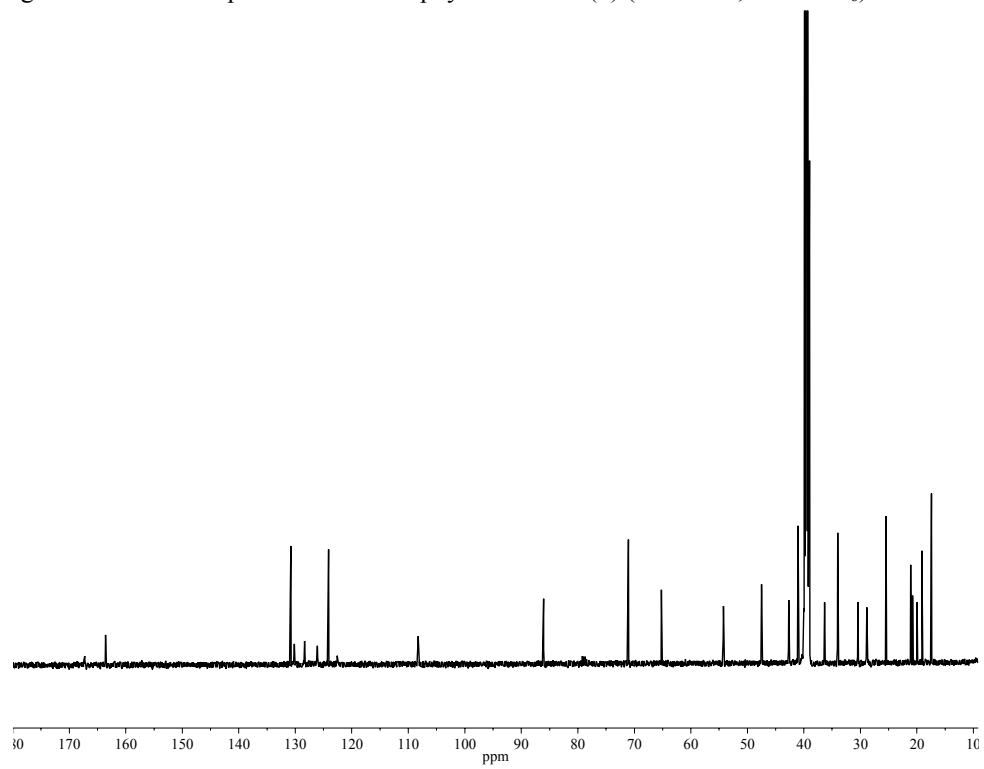



Figure 3. HSQC NMR spectrum of bromophycoic acid A (**1**) (DMSO-d<sub>6</sub>).

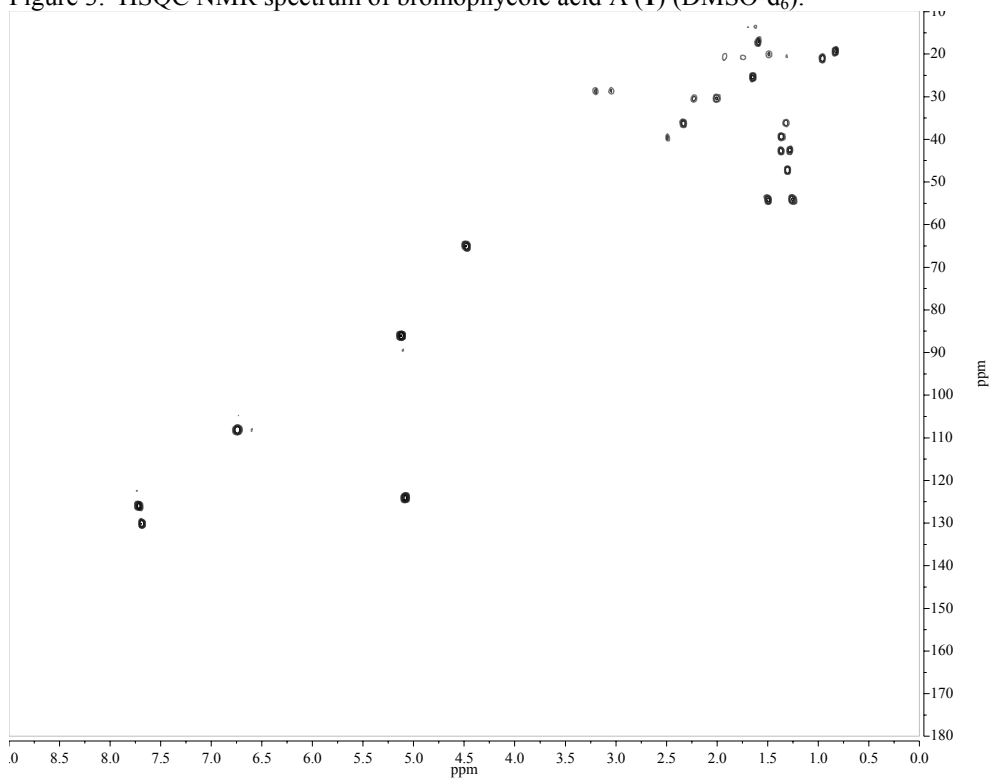

Figure 4. <sup>1</sup>H COSY NMR spectrum of bromophycoic acid A (**1**) (500 MHz; DMSO-d<sub>6</sub>).

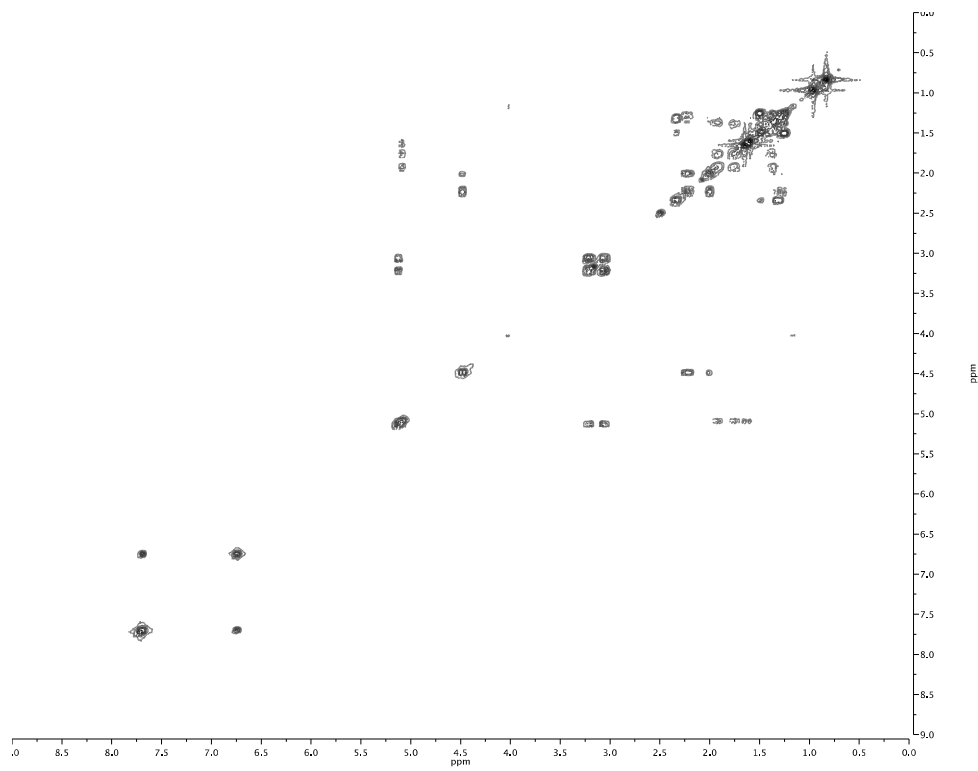

Figure 5. HMBC NMR spectrum of bromophycoic acid A (**1**) (DMSO-d<sub>6</sub>).

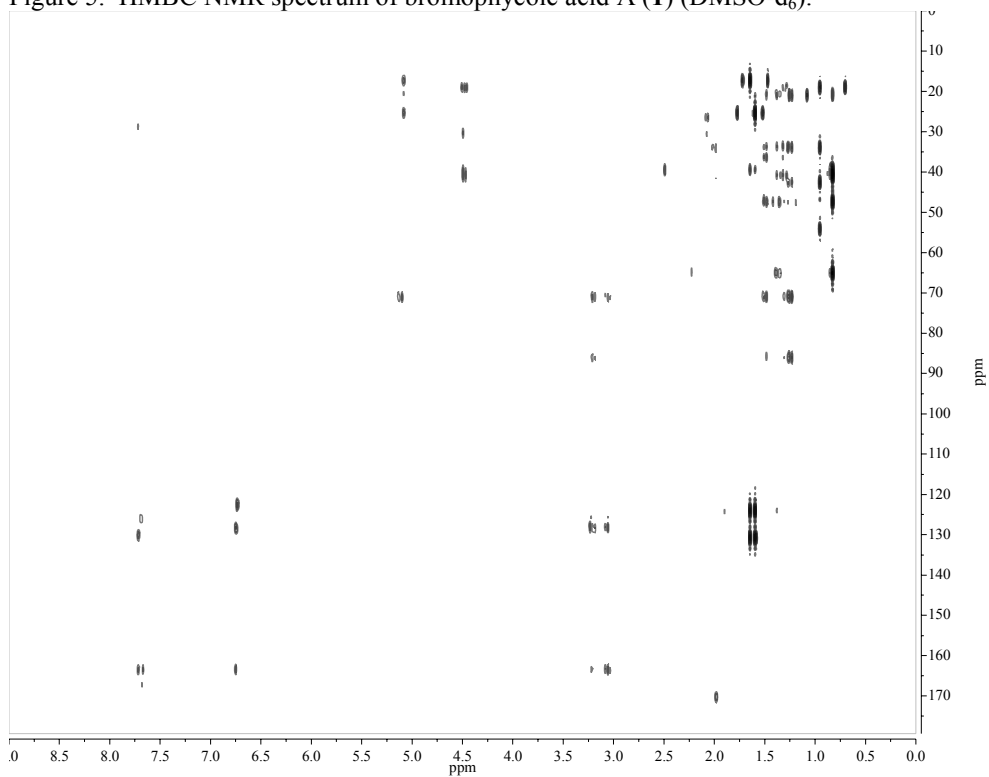

Figure 6. ROESY NMR spectrum of bromophycoic acid A (**1**) (DMSO-d<sub>6</sub>).

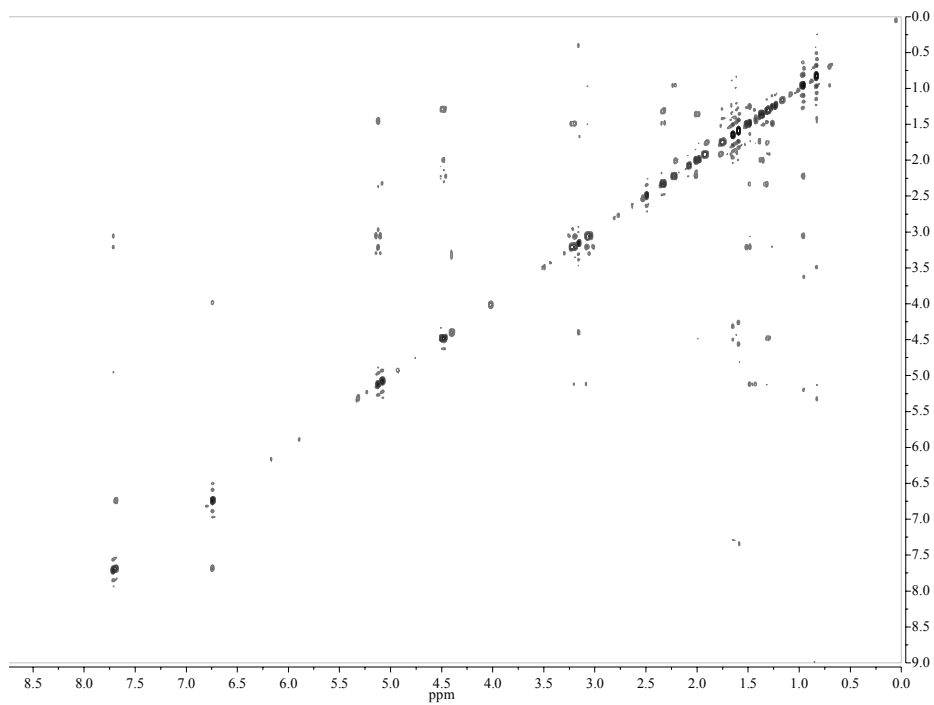

Figure 7.  $^1\text{H}$  NMR spectrum of bromophycoic acid **(2)** (500 MHz;  $\text{DMSO-d}_6$ ).

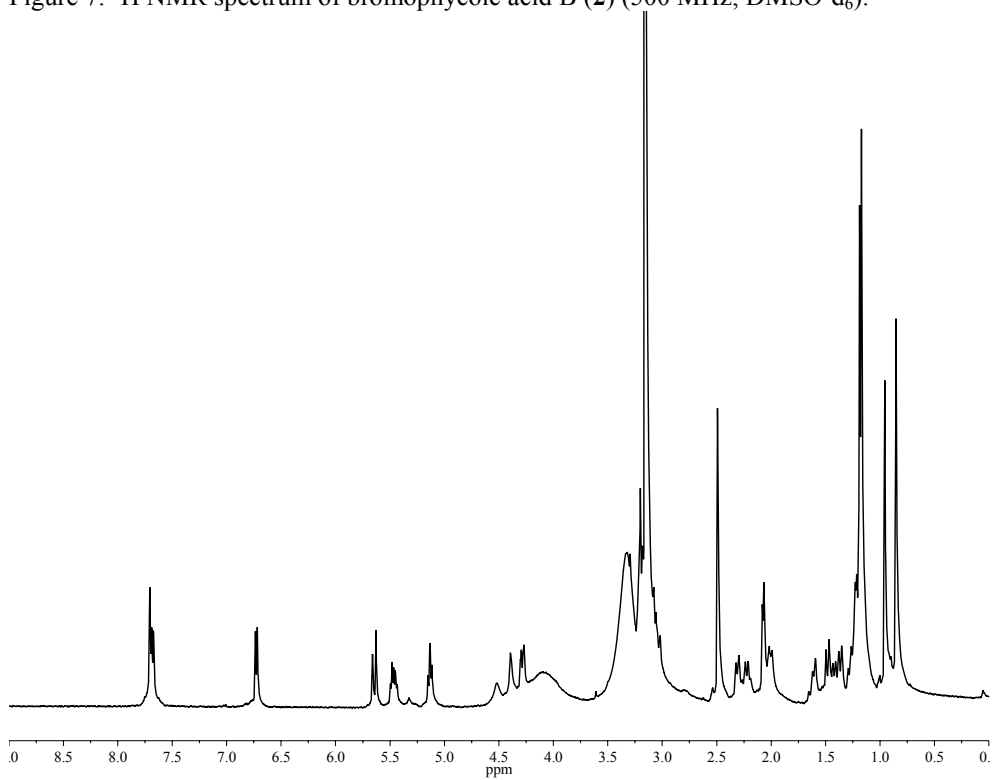

Figure 8.  $^{13}\text{C}$  DEPT-135 NMR spectrum of bromophycoic acid **(2)** (125 MHz;  $\text{DMSO-D}_6$ ).

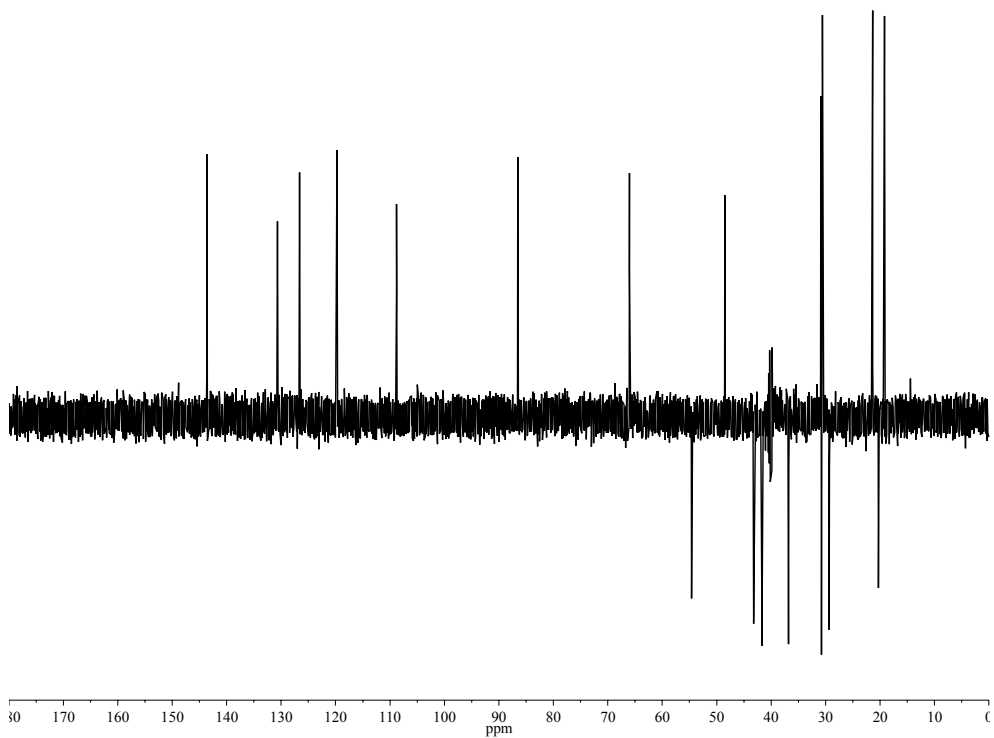

Figure 9. HSQC NMR spectrum of bromophycoic acid B (**2**) (DMSO-d<sub>6</sub>).

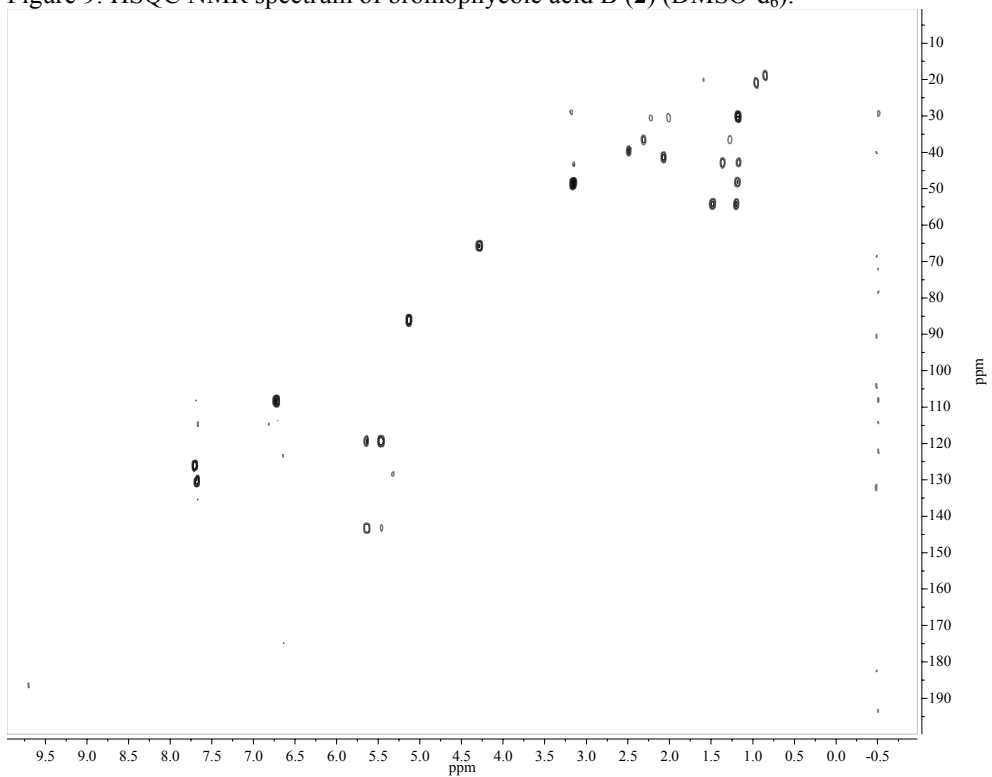

Figure 10. <sup>1</sup>H COSY NMR spectrum of bromophycoic acid B (**2**) (500 MHz; DMSO-d<sub>6</sub>).

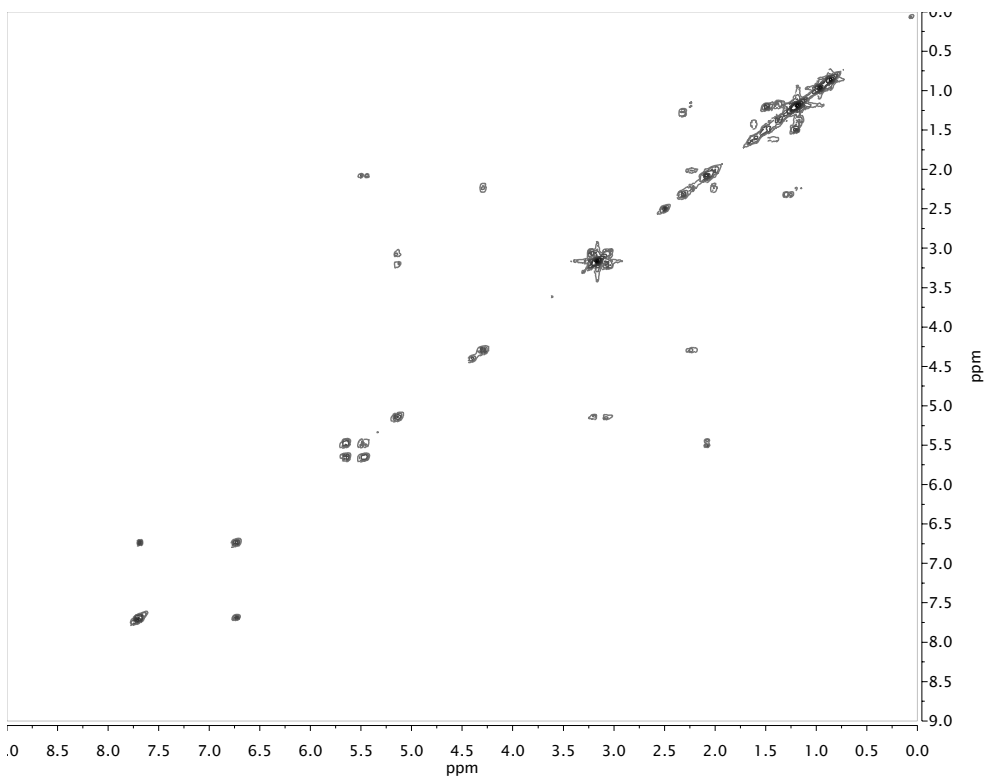

Figure 11. HMBC NMR spectrum of bromophycoic acid B (**2**) (DMSO-d<sub>6</sub>).

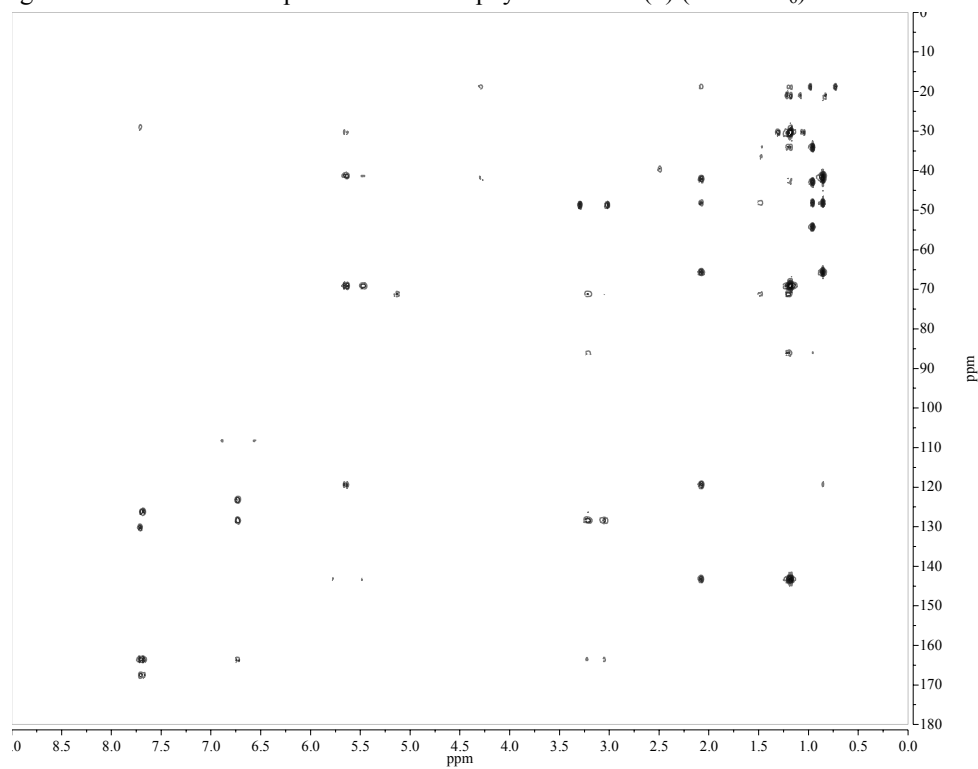

Figure 12. ROESY NMR spectrum of bromophycoic acid B (**2**) (DMSO-d<sub>6</sub>).

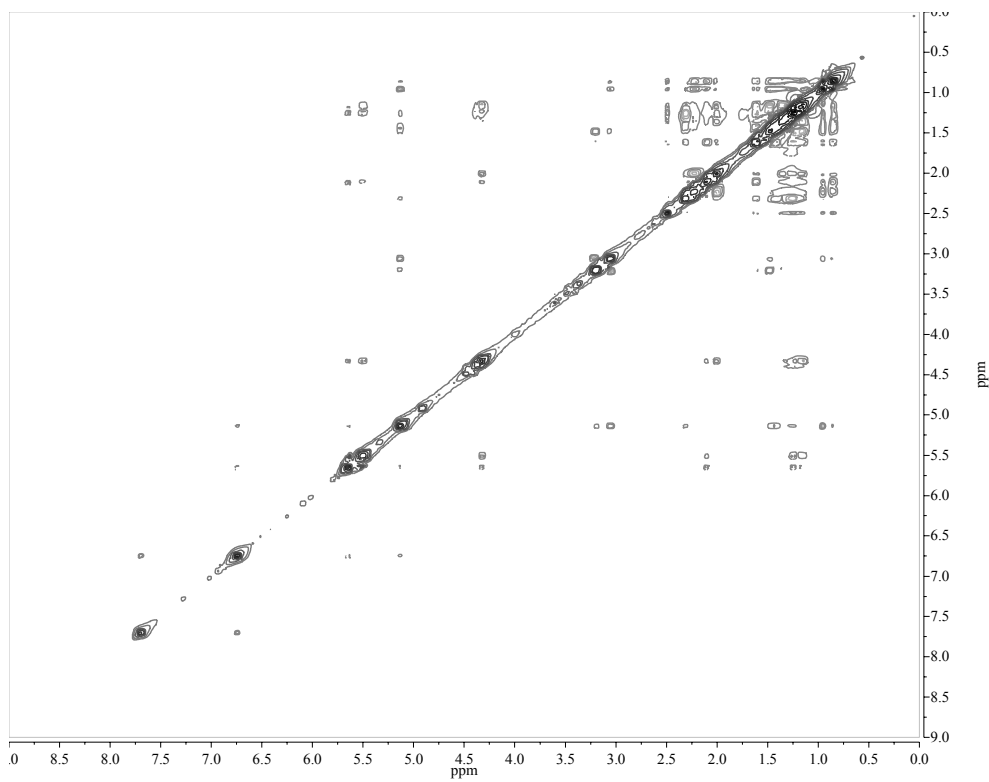

Figure 13.  $^1\text{H}$  NMR spectrum of bromophycoic acid **3** (125 MHz;  $\text{DMSO-d}_6$ ).

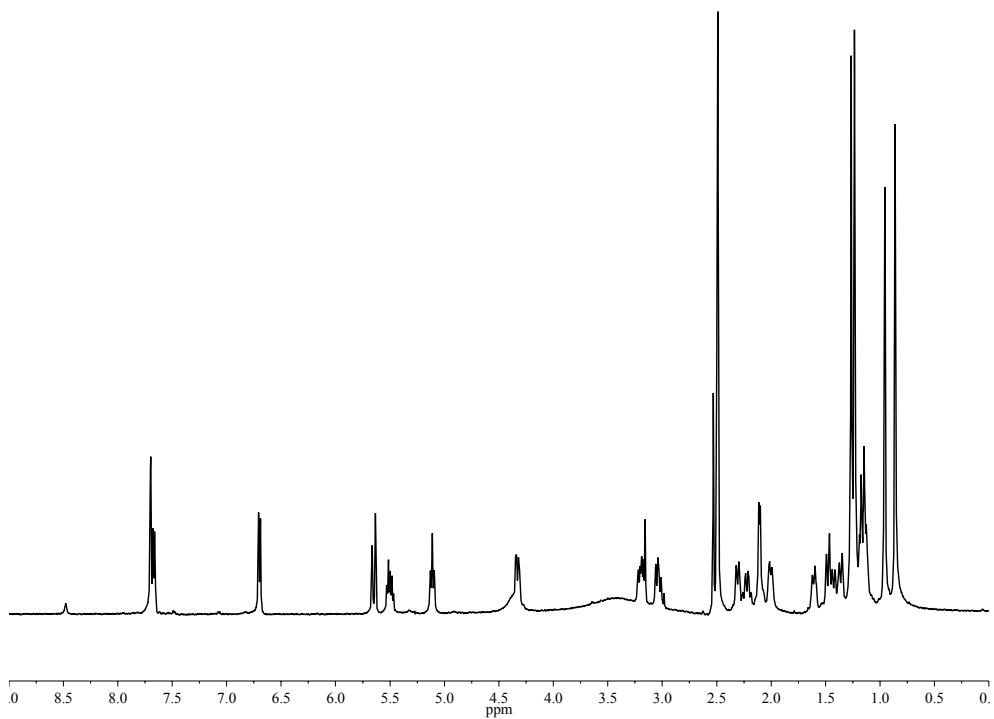

Figure 14.  $^{13}\text{C}$  NMR spectrum of bromophycoic acid **3** (125 MHz;  $\text{DMSO-d}_6$ ).

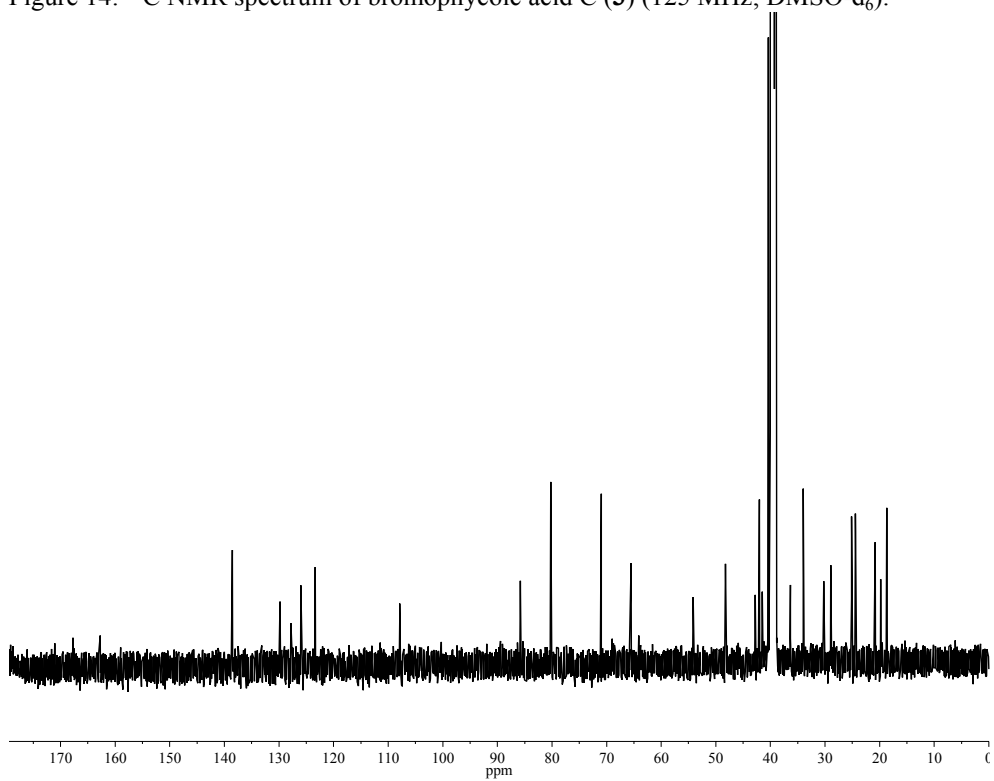

Figure 15. HSQC NMR spectrum of bromophycoic acid **(3)** (DMSO-d<sub>6</sub>).

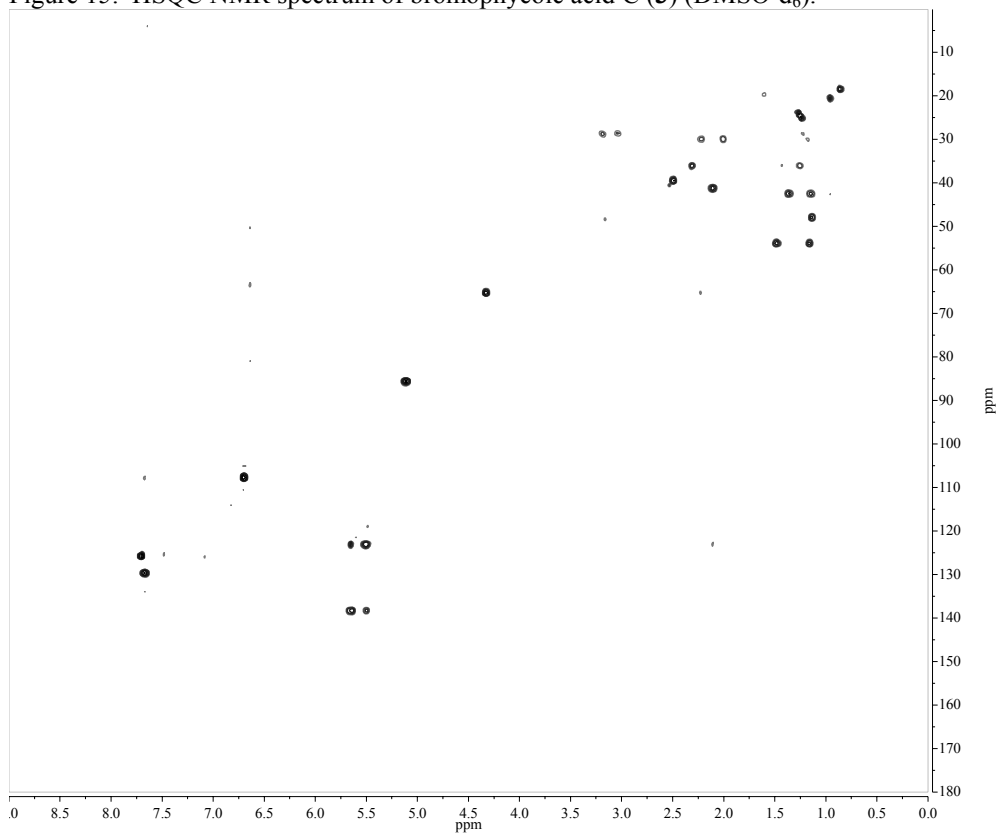

Figure 16. <sup>1</sup>H COSY NMR spectrum of bromophycoic acid **(3)** (500 MHz; DMSO-d<sub>6</sub>).

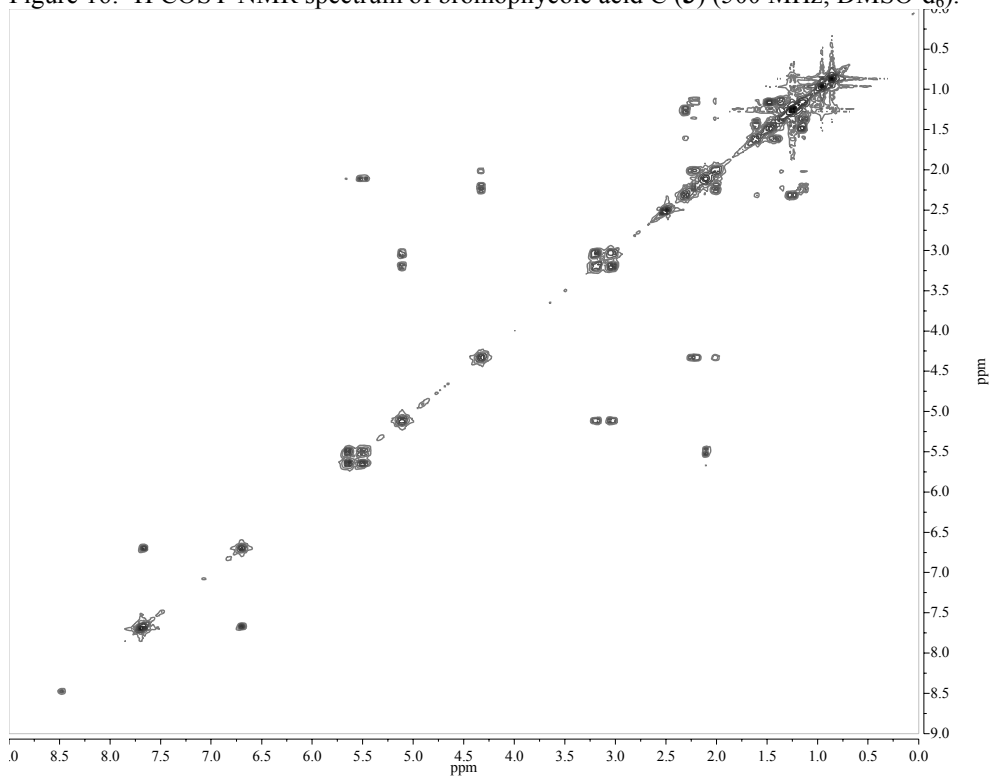

Figure 17. HMBC NMR spectrum of bromophycoic acid C (**3**) (DMSO-d<sub>6</sub>).

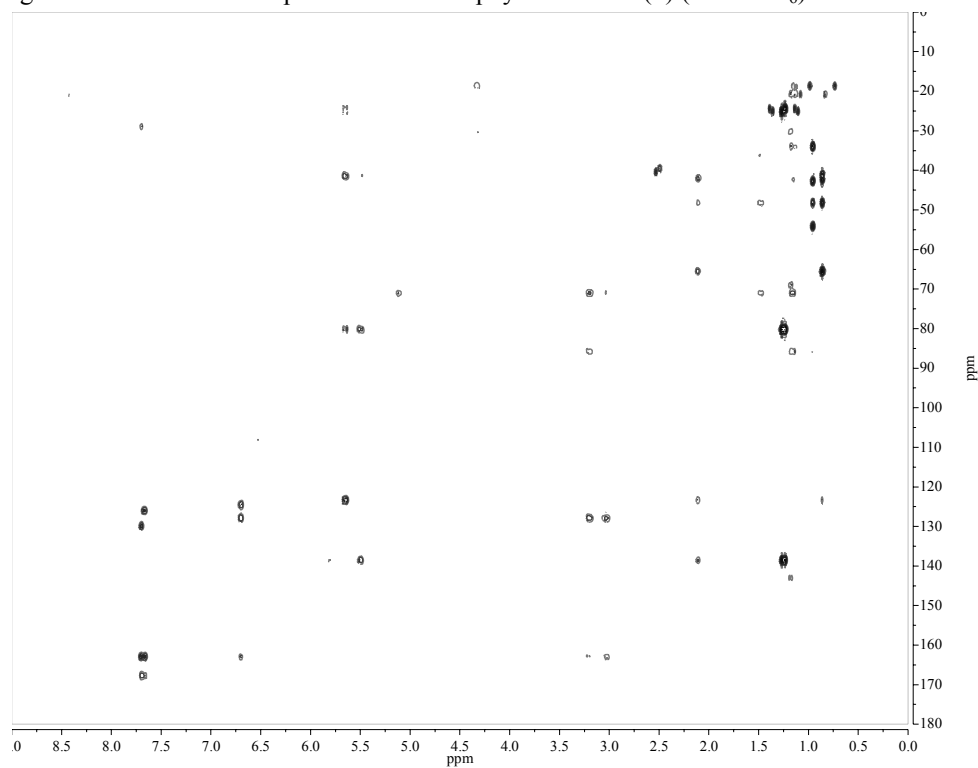

Figure 18. ROESY NMR spectrum of bromophycoic acid C (**3**) (DMSO-d<sub>6</sub>).

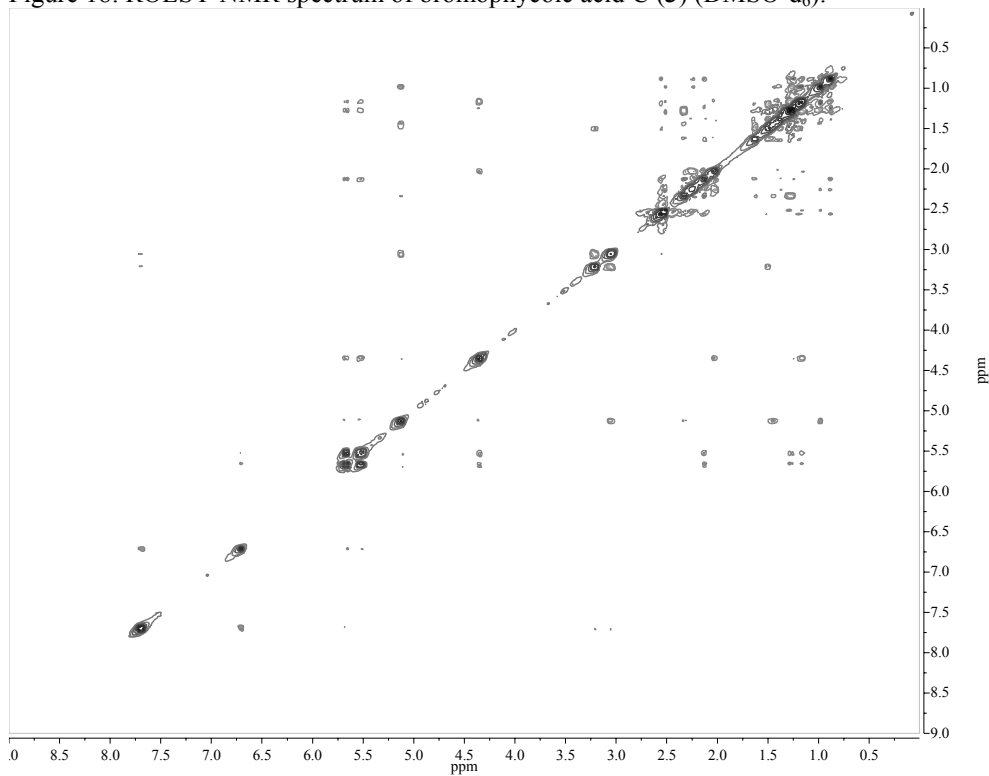



Figure 19.  $^1\text{H}$  NMR spectrum of bromophycoic acid D (**4**) (500 MHz;  $\text{DMSO-d}_6$ ).

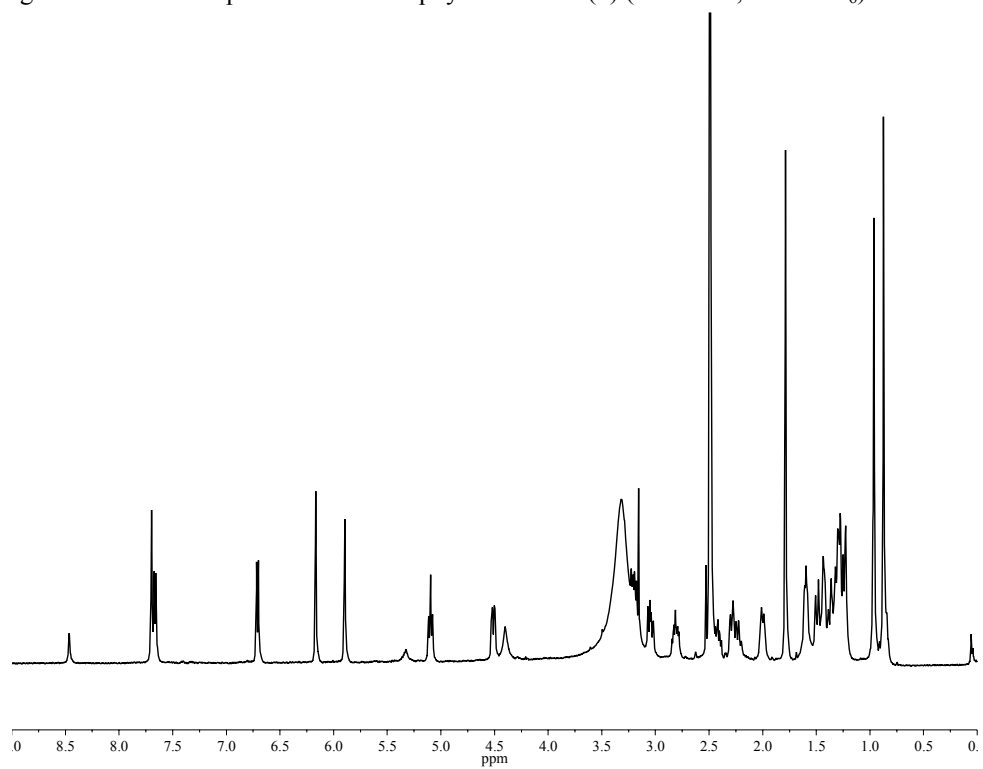

Figure 20.  $^{13}\text{C}$  DEPT-135 NMR spectrum of bromophycoic acid D (**4**) (125 MHz;  $\text{DMSO-D}_6$ ).

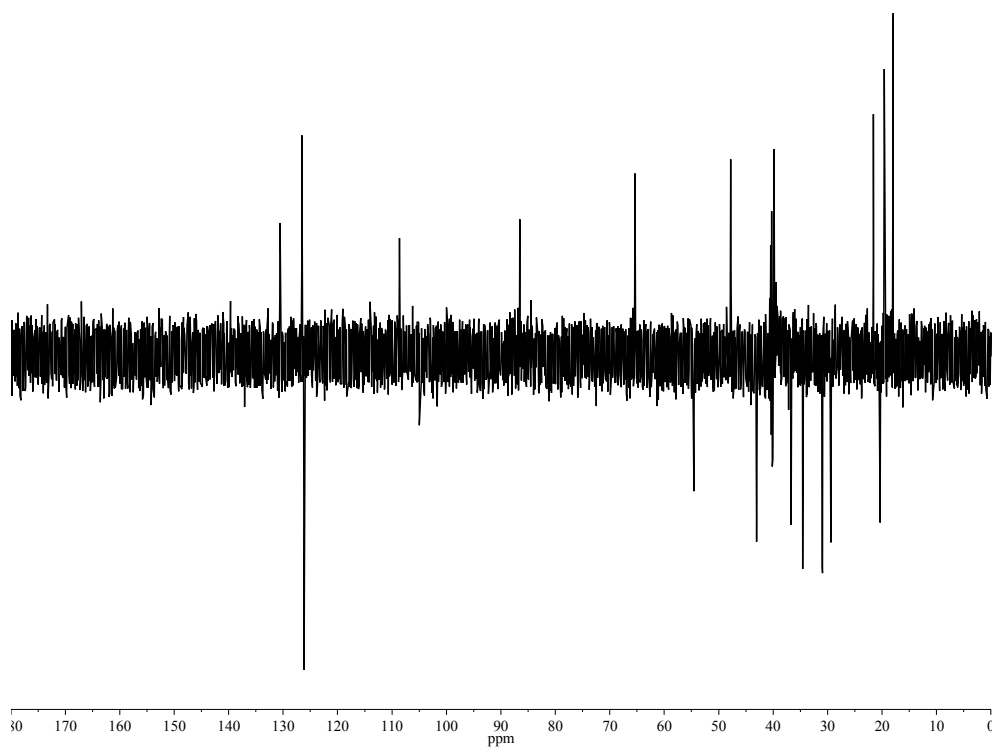

Figure 21. HSQC NMR spectrum of bromophycoic acid D (4) (DMSO-d<sub>6</sub>).

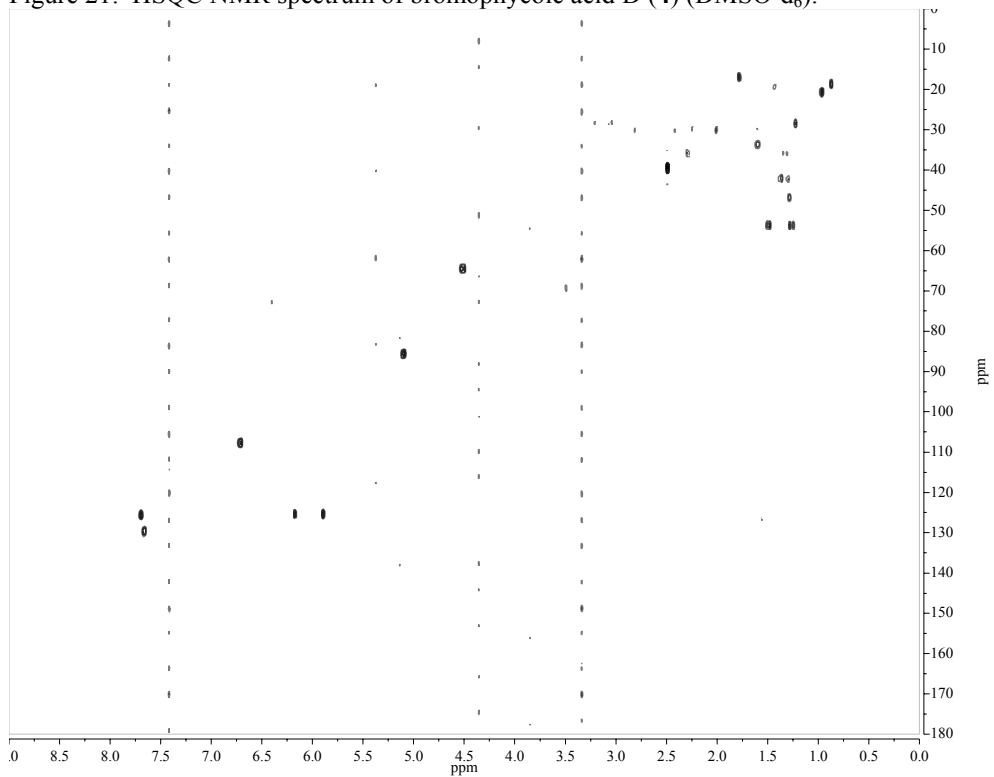

Figure 22. <sup>1</sup>H COSY NMR spectrum of bromophycoic acid D (4) (500 MHz; DMSO-d<sub>6</sub>).

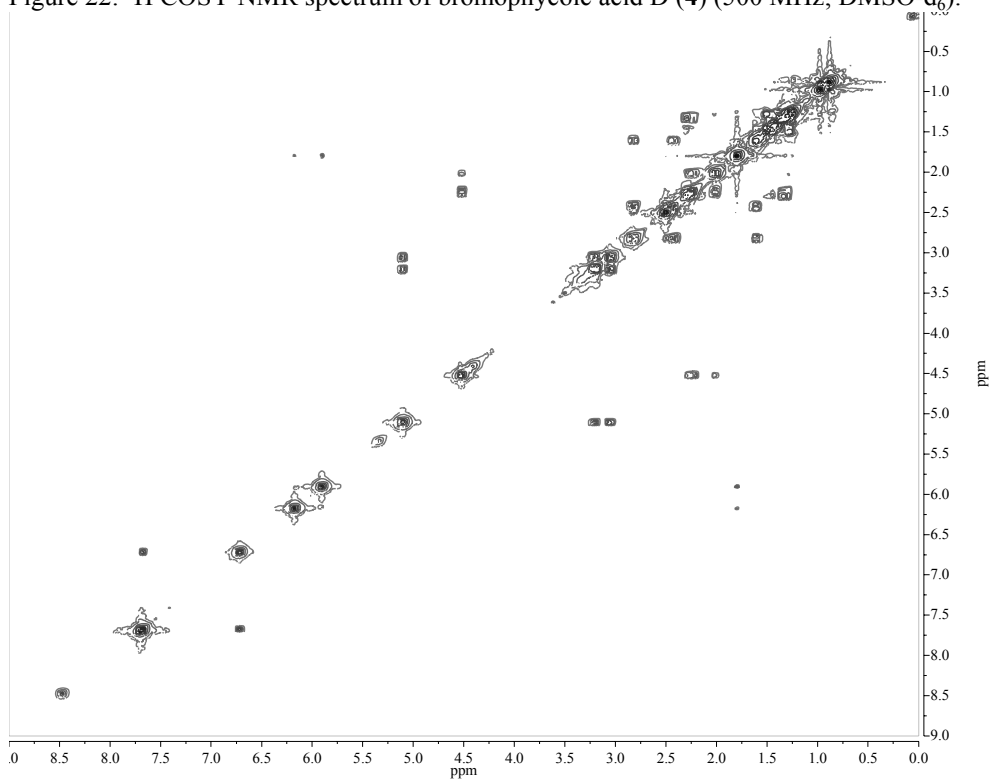

Figure 23. HMBC NMR spectrum of bromophycoic acid D (4) (DMSO-d<sub>6</sub>).

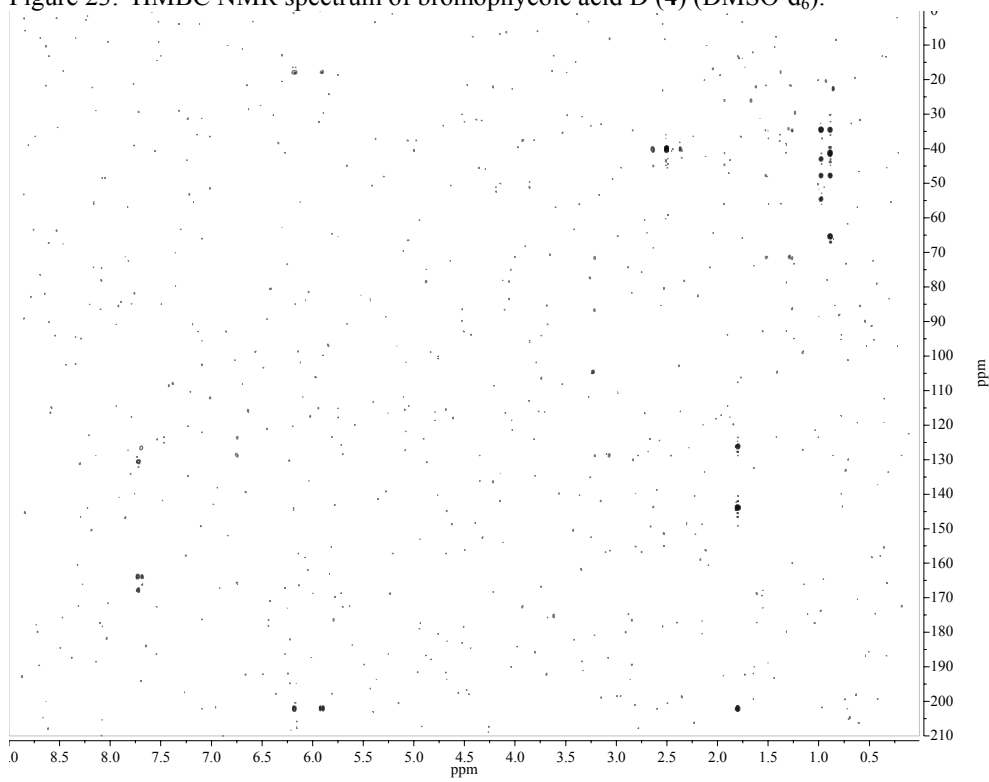

Figure 24. ROESY NMR spectrum of bromophycoic acid D (4) (DMSO-d<sub>6</sub>).

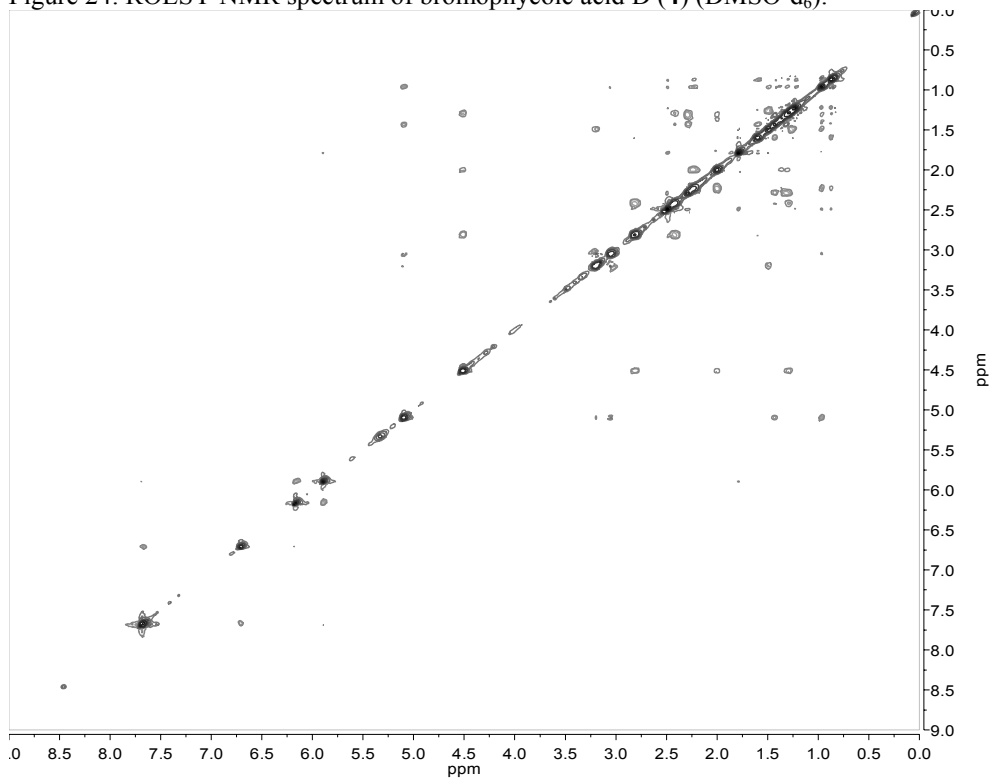

Figure 25.  $^1\text{H}$  NMR spectrum of bromophycoic acid **(5)** (500 MHz;  $\text{CDCl}_3$ ).

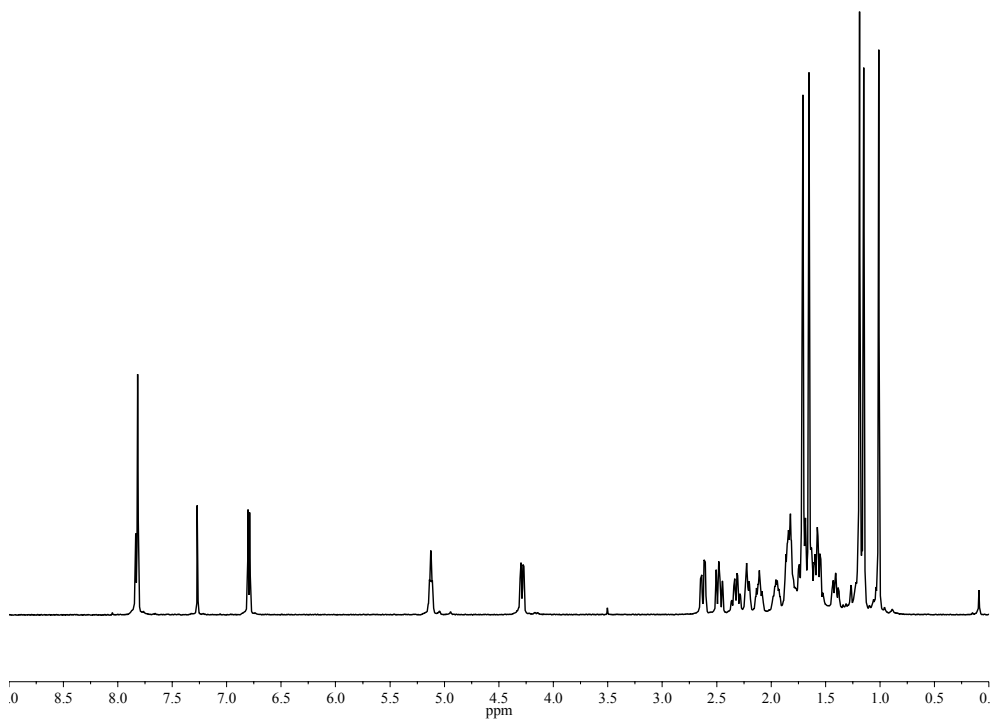

Figure 26.  $^{13}\text{C}$  NMR spectrum of bromophycoic acid **(5)** (125 MHz;  $\text{CDCl}_3$ ).

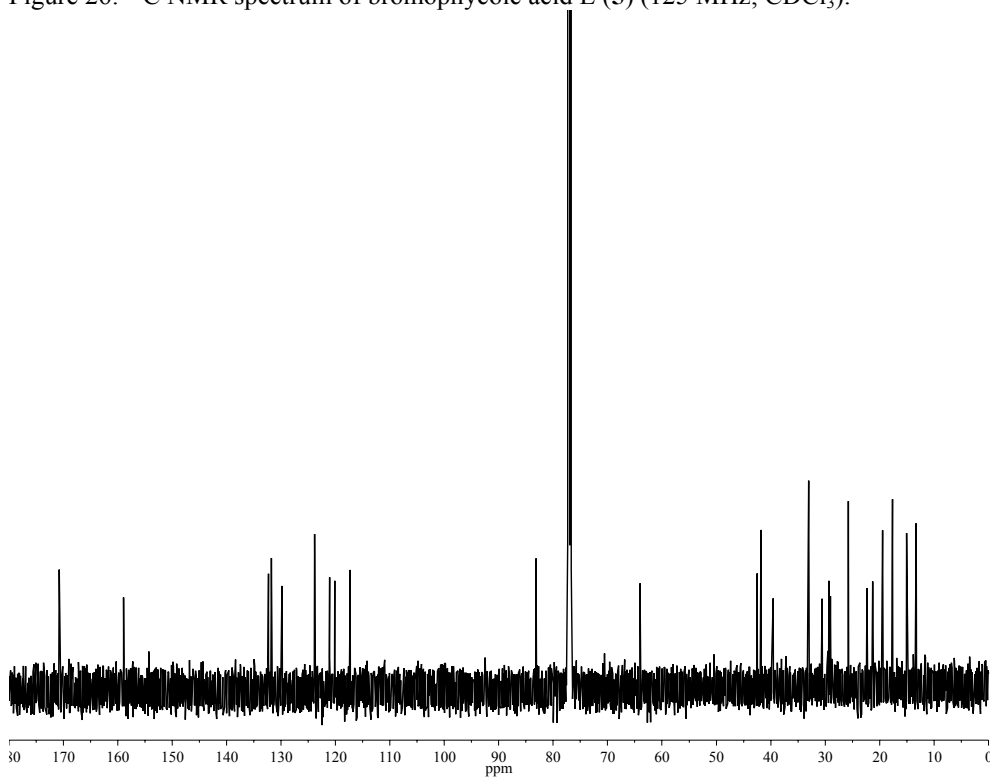

Figure 27. DEPT-135 spectrum of bromophycoic acid E (**5**) (125 MHz; CDCl<sub>3</sub>).

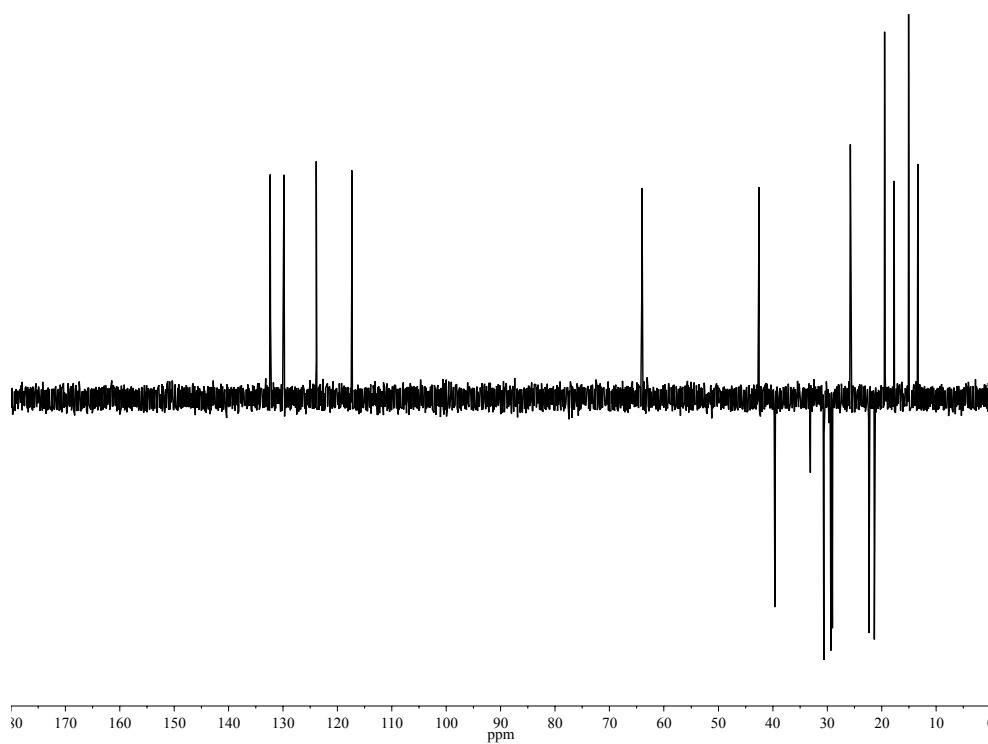

Figure 28. HSQC NMR spectrum of bromophycoic acid E (**5**) (CDCl<sub>3</sub>).

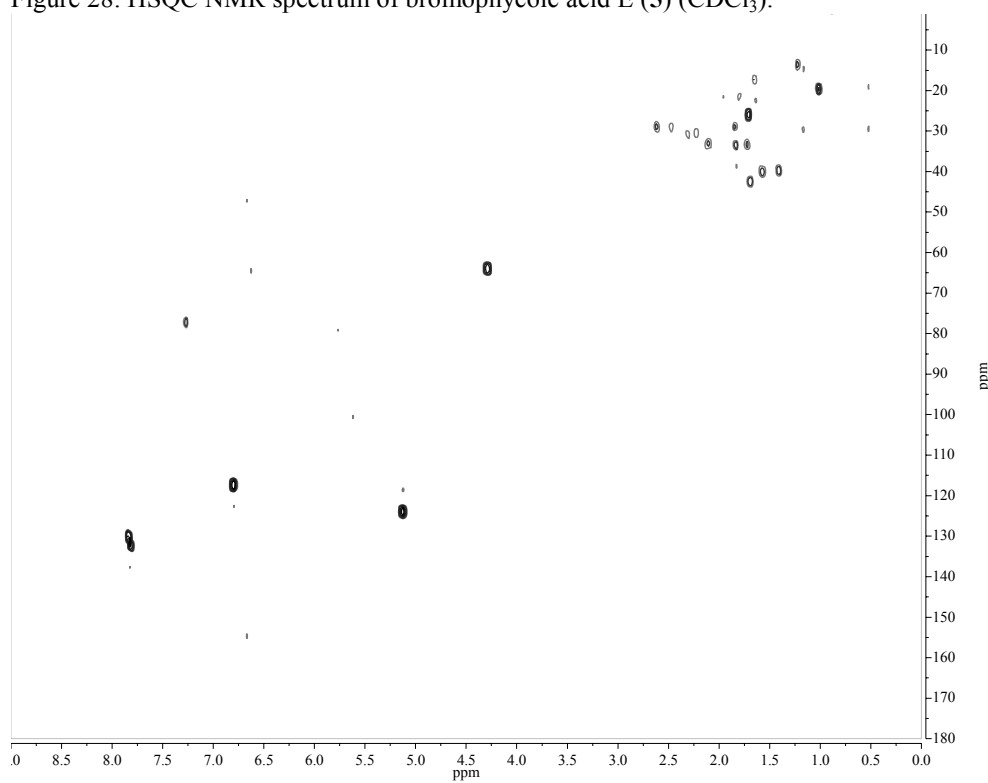

Figure 29.  $^1\text{H}$  COSY NMR spectrum of bromophycoic acid E (**5**) (500 MHz;  $\text{CDCl}_3$ ).

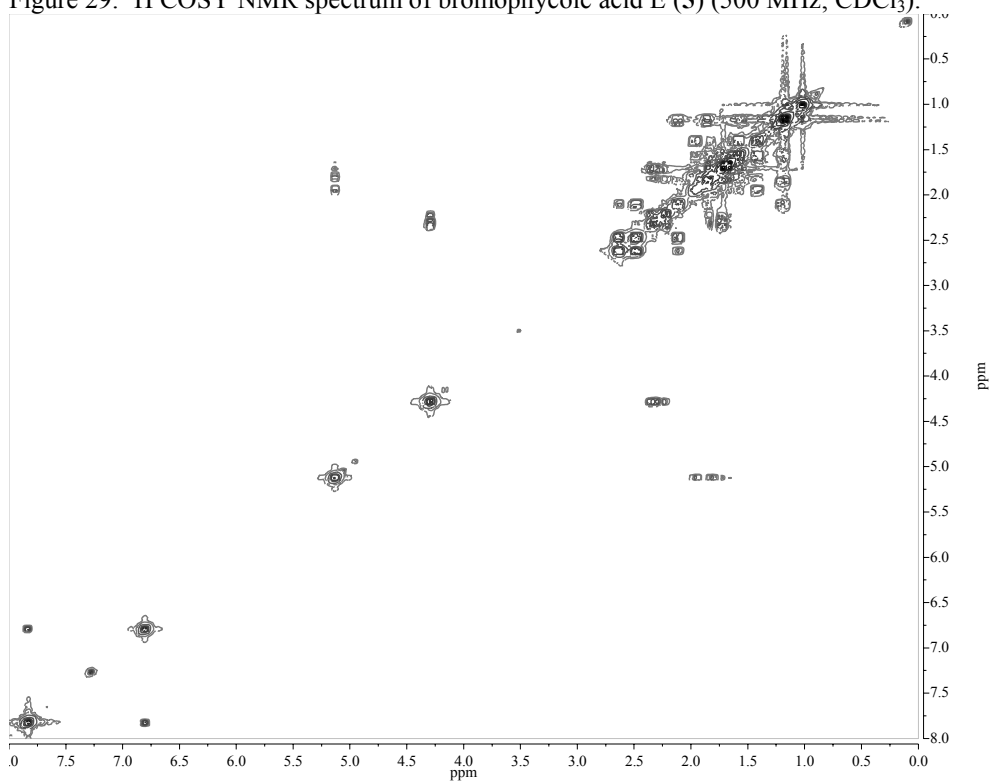

Figure 30. HMBC NMR spectrum of bromophycoic acid E (**5**) ( $\text{CDCl}_3$ ).

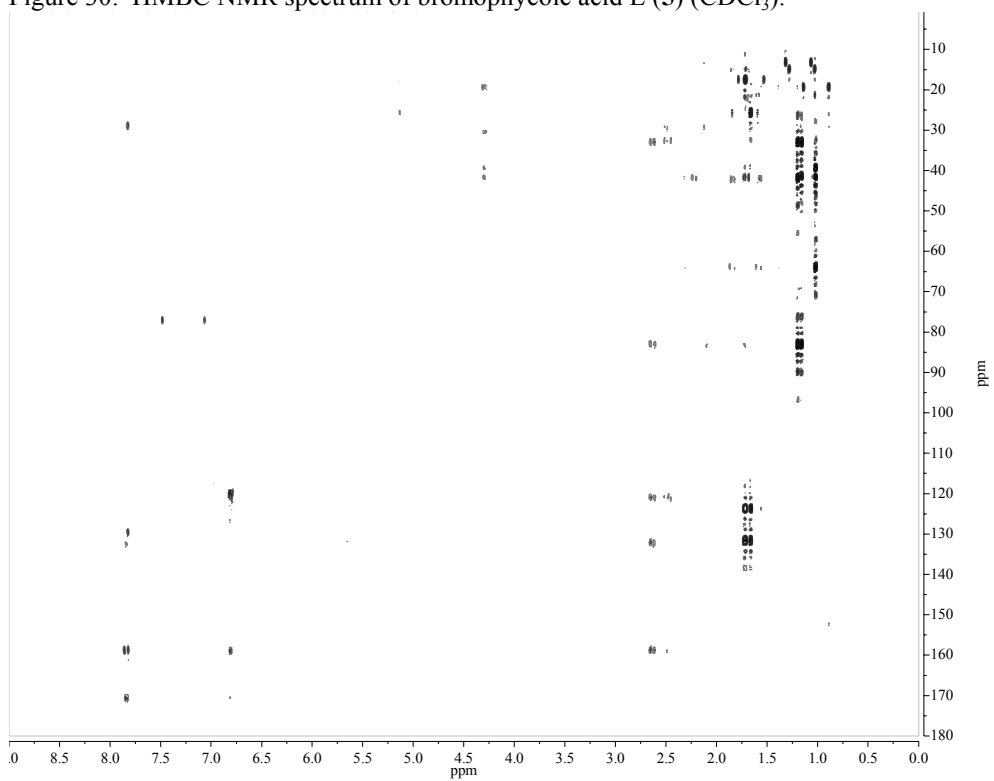

Figure 31. HSQC-TOCSY NMR spectrum of bromophycoic acid E (**5**) ( $\text{CDCl}_3$ ).

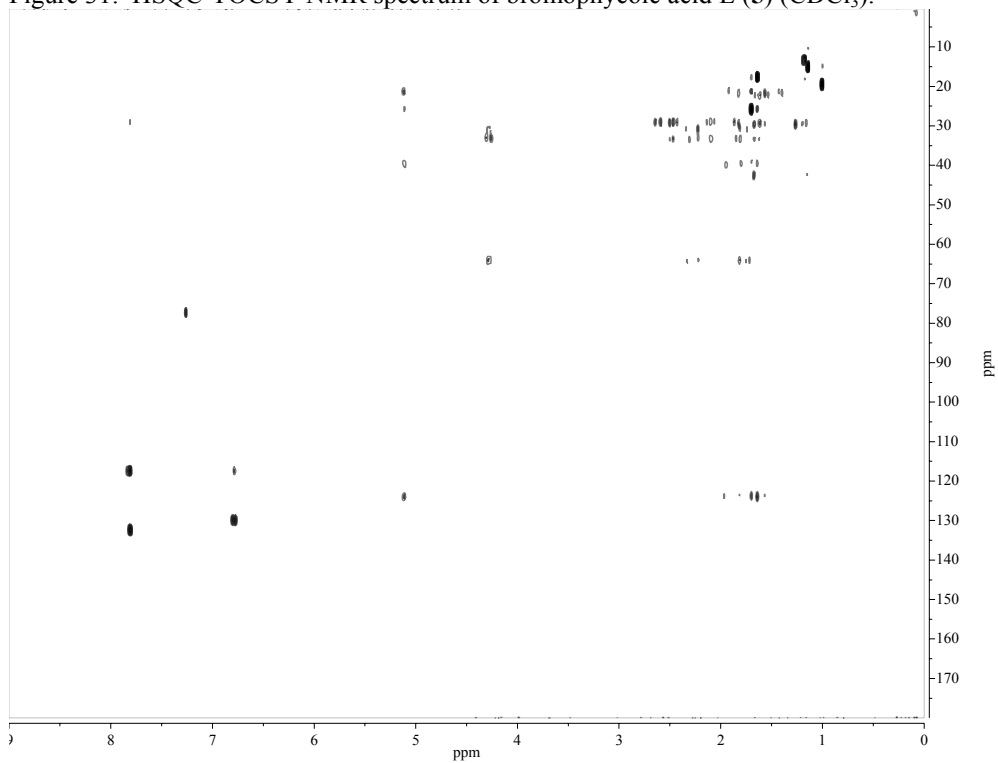

Figure 32. ROESY NMR spectrum of bromophycoic acid E (**5**) ( $\text{CDCl}_3$ ).

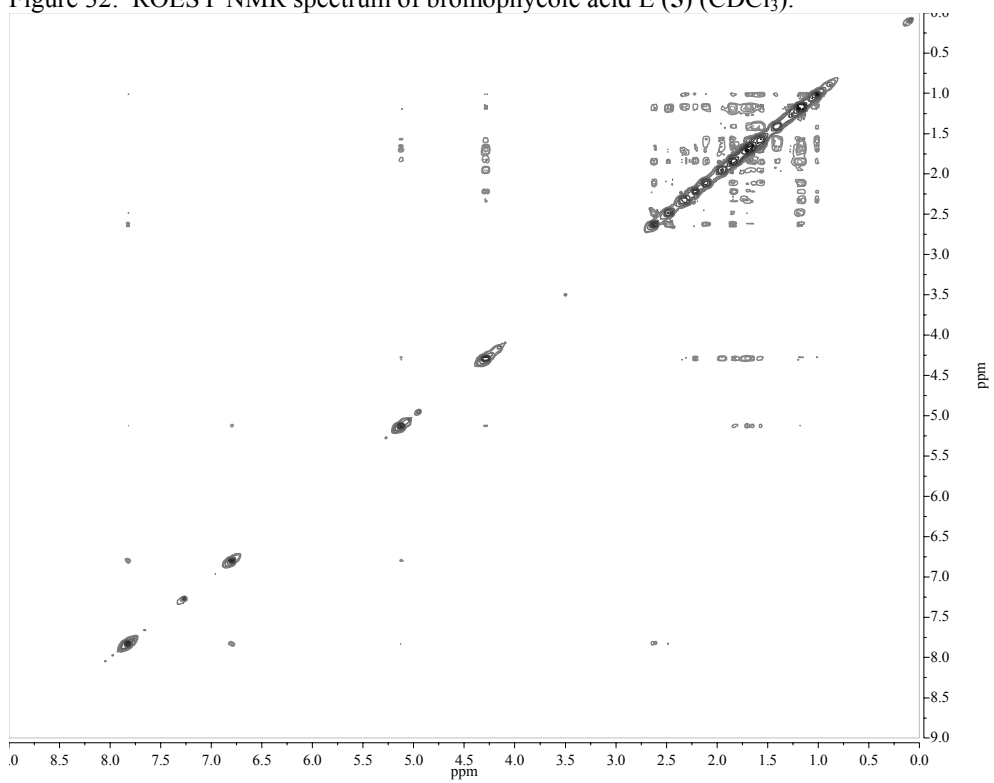

Supplement: NIHMS405747-supplement-1_si_001.pdf [file NIHMS405747-supplement-1_si_001.pdf]
